# Supplementary material for: Interdependence of JAK-STAT and MAPK signaling pathways during EGF-mediated HTR-8/SVneo cell invasion
Source: PubMed Central journal article supplement (PMC5444796; doi:10.1371/journal.pone.0178269), 2017-05-25
Supplement: pone.0178269.s002.pdf [file pone.0178269.s002.pdf]

## S2 Fig

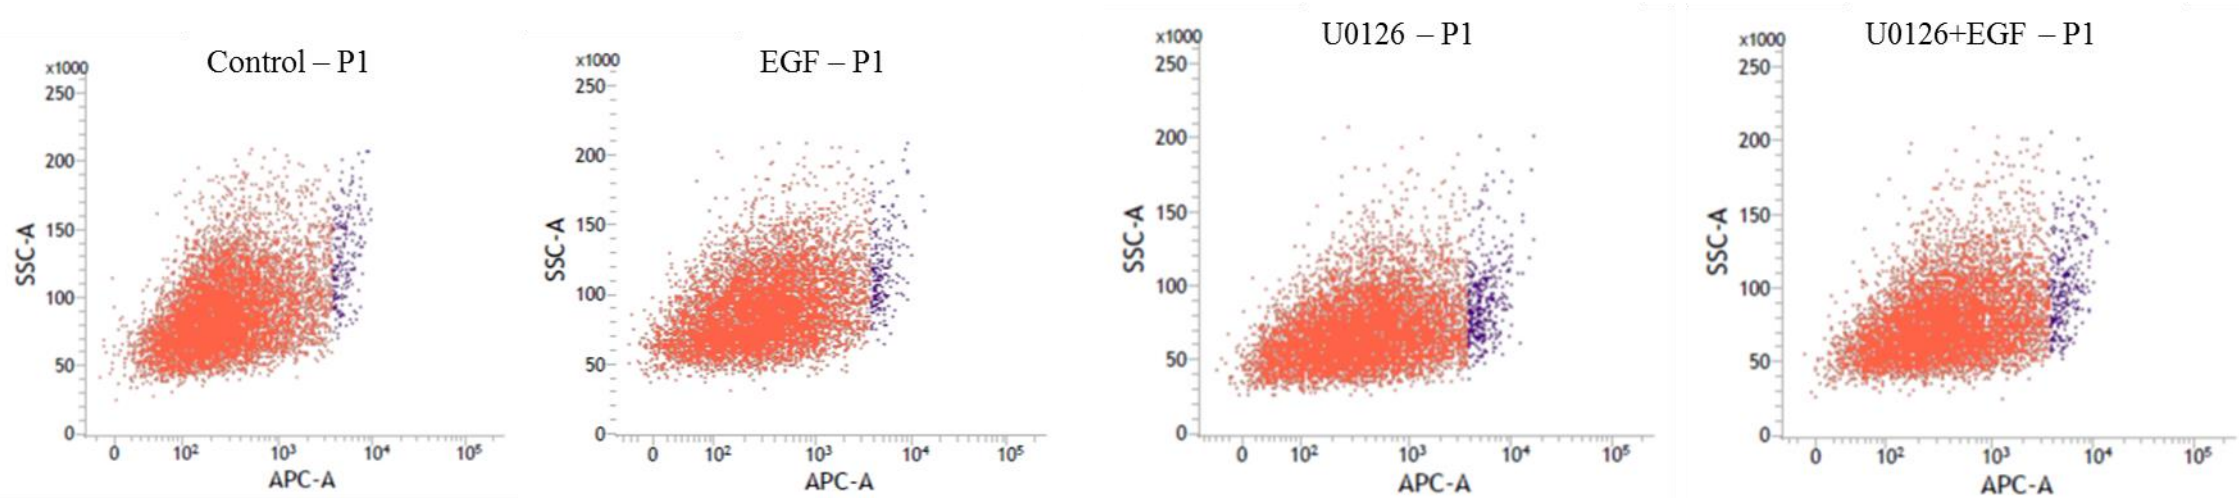

| Sample              | FSC-A mean | SSC-A Mean | % Total Stained (Dead cells) | % Parent | % Grandparent |
|---------------------|------------|------------|------------------------------|----------|---------------|
| Unstained Control   | 97,342     | 139,295    | 0.04                         | 0.05     | 0.04          |
| Stained Control     | 170,140    | 130,577    | 2.12                         | 2.34     | 2.12          |
| EGF treated         | 173,505    | 118,569    | 2.04                         | 2.31     | 2.04          |
| U0126 treated       | 171,601    | 89,679     | 3.67                         | 4.07     | 3.67          |
| U0126 + EGF treated | 173,203    | 102,563    | 3.06                         | 3,56     | 3.06          |

**S2 Fig: Cell viability of naïve, EGF treated, U0126 and U0126+EGF treated cells.** HTR-8/SVneo cells ( $0.1 \times 10^6$ /well) grown overnight in 6-well plates followed by serum starvation for 4 h, were treated with EGF, U0126 and U0126+EGF for 2 h. These cells were trypsinized and re-suspended in saline with working concentration of 5  $\mu$ M SYTOX red. Appropriate unstained control and stained untreated control were taken. Percent total stained cells (dead cells) were calculated by flow Cytometry. Graph panels show percent stained cells (blue) as compared to unstained cells (red) for stained control, EGF, U0126, U0126+EGF treated groups. The above table shows the percent values of the stained cells.
