# Supplementary material for: Interdependence of JAK-STAT and MAPK signaling pathways during EGF-mediated HTR-8/SVneo cell invasion
Source: PubMed Central journal article supplement (PMC5444796; doi:10.1371/journal.pone.0178269), 2017-05-25
Supplement: pone.0178269.s003.pdf [file pone.0178269.s003.pdf]

### S3 Fig

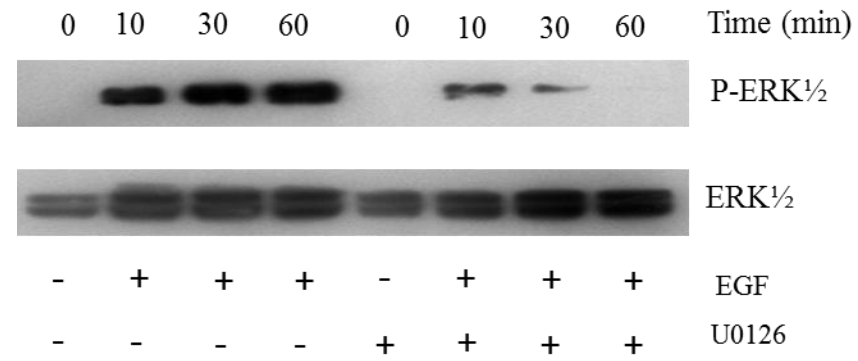

**S3 Fig: Inhibition of ERK $\frac{1}{2}$  phosphorylation by U0126.** Representative blots showing effect of U0126 pre-treatment on phosphorylation of ERK $\frac{1}{2}$  with or without EGF treatment in HTR-8/SVneo cells.
