# Supplementary material for: Interdependence of JAK-STAT and MAPK signaling pathways during EGF-mediated HTR-8/SVneo cell invasion
Source: PubMed Central journal article supplement (PMC5444796; doi:10.1371/journal.pone.0178269), 2017-05-25
Supplement: pone.0178269.s004.pdf [file pone.0178269.s004.pdf]

## S4 Fig

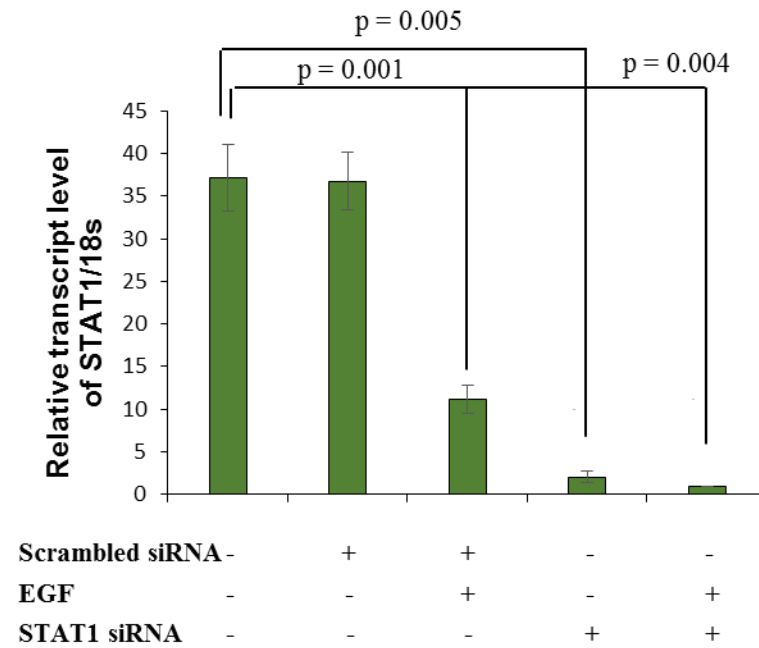

**S4 Fig: Transcript levels of STAT1 after silencing.** Bar graph represents transcript levels of STAT1 mRNA by qRT-PCR in naïve, scrambled and STAT1 siRNA transfected cells either in presence or absence of EGF.
